# Supplementary material
Source: publisher figshare collection journal article supplement (https://tandf.figshare.com/ndownloader/files/30921799)

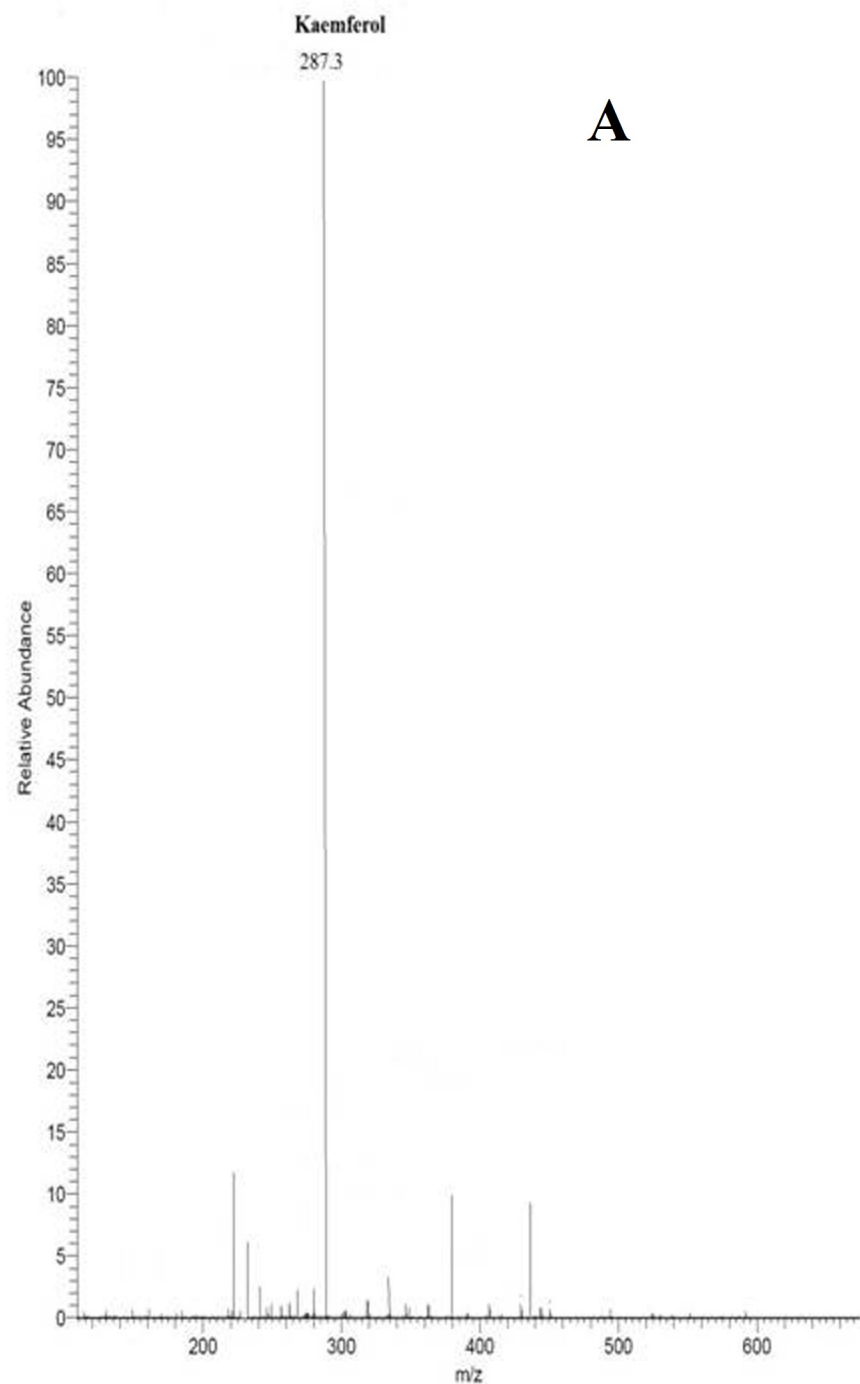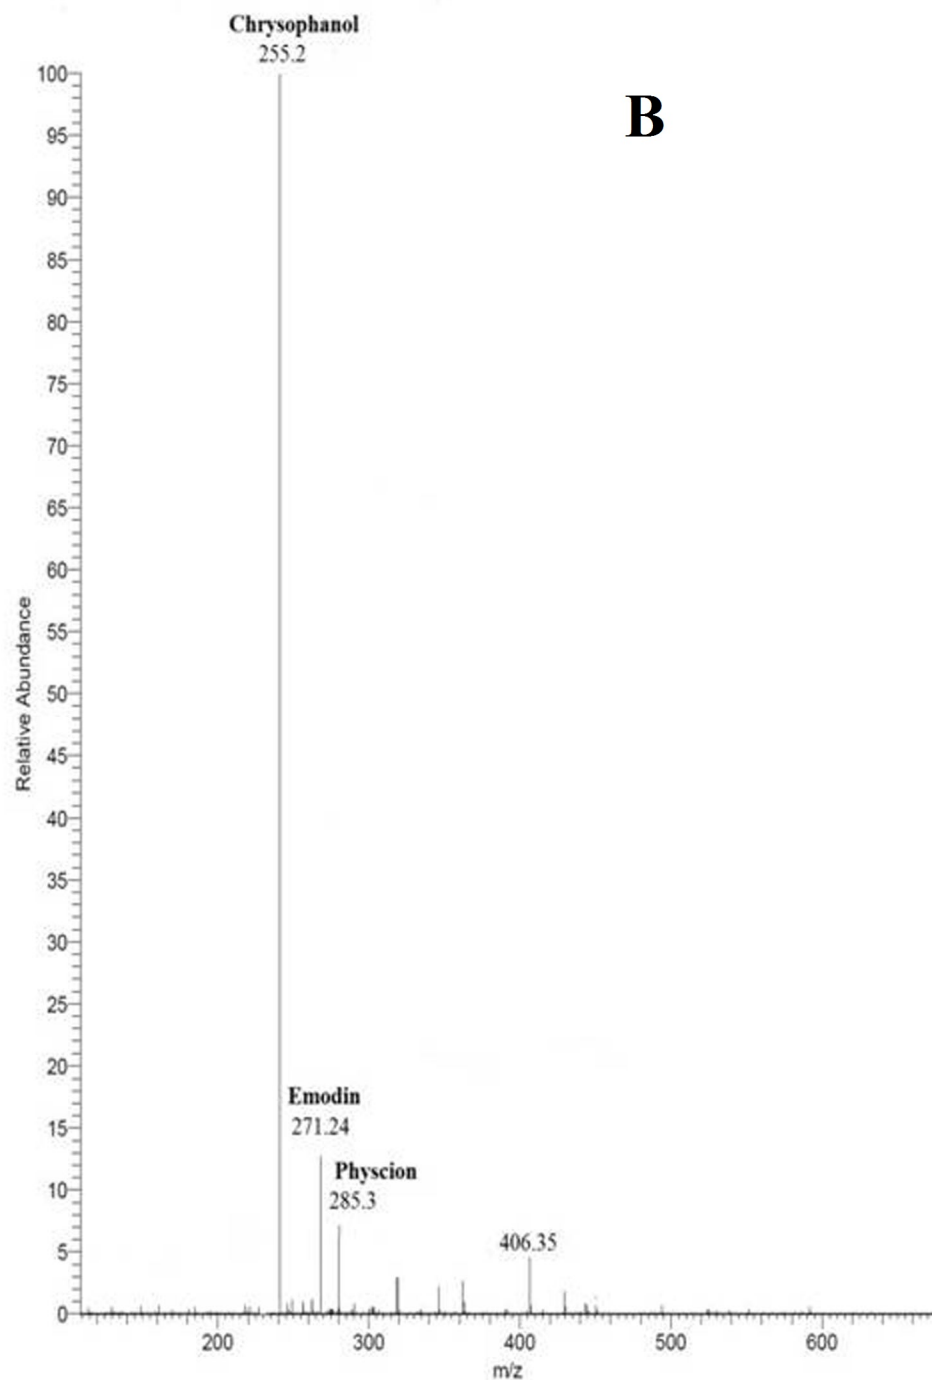

**A**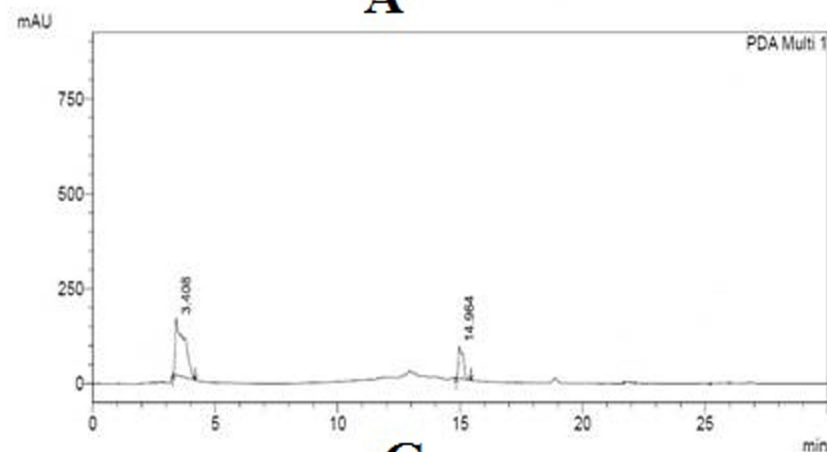**B**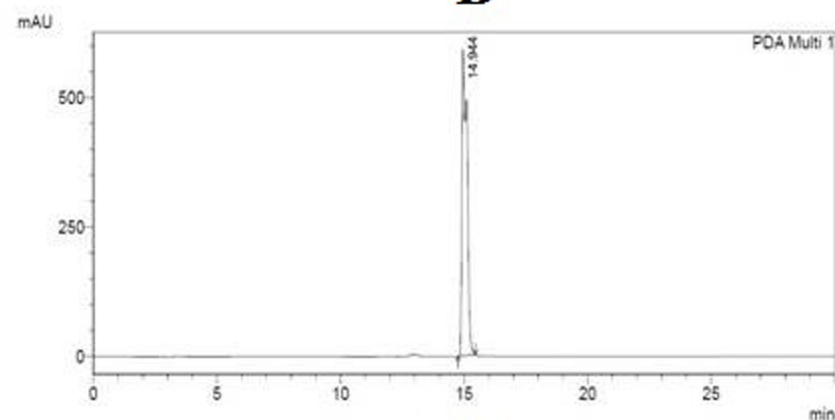**C**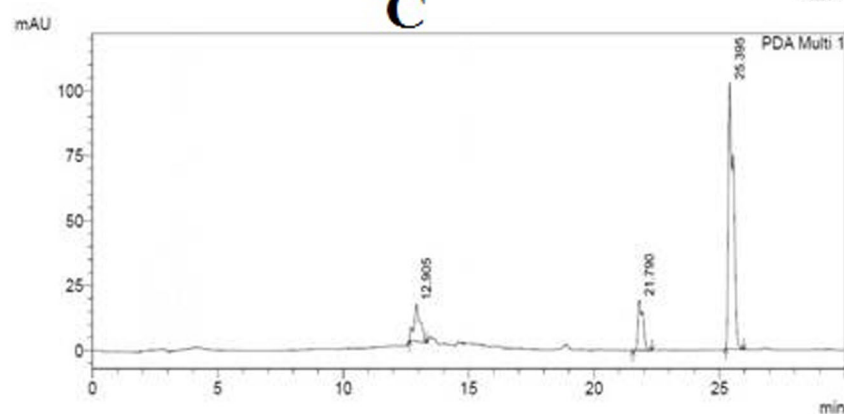**D**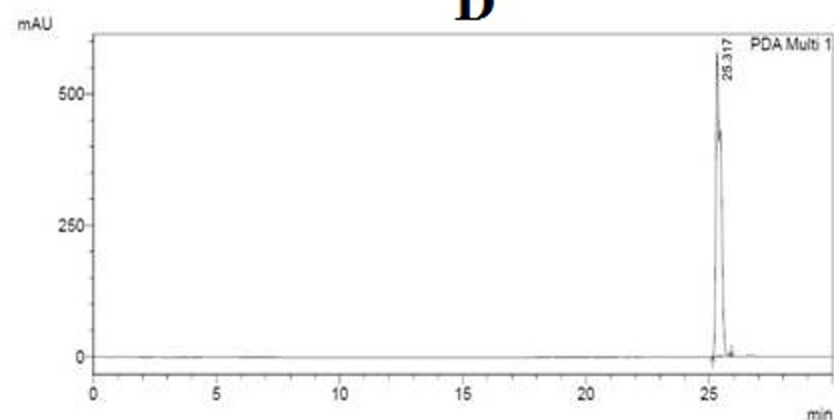**F**

| Extract/standard | Retention time |
|------------------|----------------|
| Chrysophanol     | 25.317         |
| ECT              | 25.395         |
| Emodin           | 21.799         |
| ECT              | 21.790         |
| Kaemferol        | 14.944         |
| ECT              | 14.964         |

**E**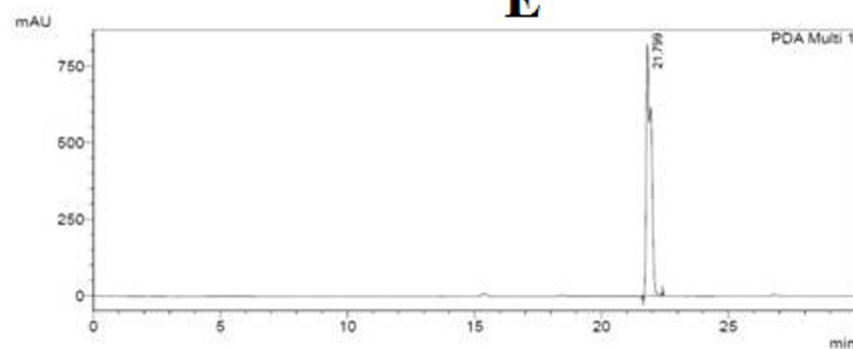

Supplement: Supplementary file 1 [file 30921799]
